# Supplementary material for: Effects of gastrointestinal delivery of non-caloric tastants on energy intake: a systematic review and meta-analysis
Source: Springer Nature journal article supplement (doi:10.1007/s00394-021-02485-4), 2021-02-08
Supplement: MOESM1 [file 18841470]

# Effects of Gastrointestinal Delivery of Non-caloric Tastants on ~~Eating Behavior~~ Energy Intake: A Systematic Review and Meta-Analysis

European Journal of Nutrition

Tim Klaassen<sup>1,2</sup>, Daniel Keszthelyi<sup>1</sup>, Freddy J. Troost<sup>1,2</sup>, Aalt Bast<sup>2</sup>, Adrian A.M. Masclee<sup>1</sup>

1. Division of Gastroenterology-Hepatology, Department of Internal Medicine, School of Nutrition and Translational Research in Metabolism (NUTRIM), Maastricht University Medical Center+, P.O. Box 5800, 6202 AZ Maastricht, The Netherlands
2. Food Innovation and Health, Center for Healthy Eating and Food Innovation, Maastricht University, 5911 AA Venlo, The Netherlands

*Corresponding author:* T. Klaassen

*E-mail:* [t.klaassen@maastrichtuniversity.nl](mailto:t.klaassen@maastrichtuniversity.nl)

*Postal address:* Postbus 5800 | 6202 AZ Maastricht

Supplementary table 1 gives an overview of the results of all included articles.

*Supplementary Table 1. Overview of included studies.*

| <b>Taste</b> | <b>Reference</b>                        | <b>Subjects</b>                                | <b>Tastants and comparators used</b> | <b>Method of administration</b> | <b>Energy intake (Kcal)</b> | <b>GI symptoms and perceptions</b> | <b>Mechanisms of effect</b> |
|--------------|-----------------------------------------|------------------------------------------------|--------------------------------------|---------------------------------|-----------------------------|------------------------------------|-----------------------------|
| <b>Sweet</b> | Rogers et al. (1990) <sup>1</sup><br>UK | 12 subjects (6 men, 6 women, 18-26y, BMI 20.8) | Aspartame capsule (234 mg)           | Gastric capsule                 | -175 Kcal                   | N/A                                | N/A                         |

|                                            |                                                   |                                                                                                    |                      |                                                                          |                                                                                                                                                             |                                                                                                           |  |
|--------------------------------------------|---------------------------------------------------|----------------------------------------------------------------------------------------------------|----------------------|--------------------------------------------------------------------------|-------------------------------------------------------------------------------------------------------------------------------------------------------------|-----------------------------------------------------------------------------------------------------------|--|
|                                            |                                                   | Comparator:<br>Placebo capsule                                                                     |                      |                                                                          |                                                                                                                                                             |                                                                                                           |  |
|                                            | 15 subjects (10 men, 5 women, 19-24y, normal BMI) | Aspartame capsule (235 mg)<br><br>Aspartame capsule (470 mg)<br><br>Comparator:<br>Placebo capsule | Gastric capsule      | -138 Kcal for 235mg aspartame<br><br>-150 Kcal for 470 mg aspartame      | Aspartame capsules reduced desire to eat and hunger scores ( $p < .05$ )<br><br>Aspartame capsules tended to increase fullness compared with placebo (n.s.) | N/A                                                                                                       |  |
| Black et al. (1993) <sup>2</sup><br>Canada | 18 subjects (18 men, 19-25y, BMI 21-25)           | Aspartame capsule (340 mg)<br><br>Comparator:<br>Water                                             | Gastric capsule      | No effect on energy intake<br><br>No effect on macronutrient composition | Aspartame capsules had no effect on appetite sensations                                                                                                     | N/A                                                                                                       |  |
| Little et al. (2009) <sup>3</sup><br>UK    | 10 subjects                                       | Saccharin (50 mg)<br><br>Aspartame (200 mg)<br><br>Comparator:<br>Tap water                        | Nasogastric catheter | N/A                                                                      | No effects of aspartame or saccharin on hunger or fullness                                                                                                  | No effects of aspartame or saccharin GE                                                                   |  |
| Ma et al. (2009) <sup>4</sup><br>Australia | 7 subjects (24 y, BMI 21.6)                       | Sucralose (80 mg)<br><br>Sucralose (800 mg)<br><br>Comparator:                                     | Nasogastric catheter | N/A                                                                      | N/A                                                                                                                                                         | No effects of sucralose on gastric emptying, plasma glucose, plasma insulin, plasma GLP-1, or plasma GIP. |  |

| Saline                                                    |                                                                                                                            |                                                                                       |                       |                 |                                                                                                                                                         |                                                                                                                                                                                                                                                                              |
|-----------------------------------------------------------|----------------------------------------------------------------------------------------------------------------------------|---------------------------------------------------------------------------------------|-----------------------|-----------------|---------------------------------------------------------------------------------------------------------------------------------------------------------|------------------------------------------------------------------------------------------------------------------------------------------------------------------------------------------------------------------------------------------------------------------------------|
| Steinert et al. (2011) <sup>5</sup><br>Switzerland        | 12 subjects (6 men, 6 women, 23.3 y, BMI 23.0)                                                                             | Aspartame (160 mg)<br>Ace-K (200 mg)<br>sucralose (62 mg)<br>Comparator:<br>Tap water | Nasogastric catheter  | N/A             | Artificial sweeteners reduced hunger, and increased satiety and fullness ratings to an intermediate amount between water and carbohydrate sugars (n.s.) | Sweeteners did not affect plasma GLP-1, PYY, ghrelin, glucose, insulin, or glucagon levels                                                                                                                                                                                   |
| Van Avesaat et al. (2015) <sup>6</sup><br>The Netherlands | 15 subjects (6 men, 9 women, 22.4 y, BMI 22.4)                                                                             | Reb-A (540 mg)<br>Comparator:<br>Tap water                                            | Nasoduodenal catheter | -24 Kcal (n.s.) | Reb-A did not influence appetite sensations. Reb-A did not induce GI symptoms                                                                           | Reb-A did not affect plasma CCK, GLP-1, or PYY                                                                                                                                                                                                                               |
| Wölnerhanssen et al. (2016) <sup>7</sup><br>Switzerland   | 20 subjects<br>10 lean subjects (5 men, 5 women, 26.6 y, BMI 21.7)<br>10 obese subjects (5 men, 5 women, 27.2 y, BMI 40.0) | Xylitol (50 g)<br>Erythritol (75 g)<br>Comparator:<br>Tap water                       | Nasogastric catheter  | N/A             | Both sweeteners did not affect appetite sensations. Xylitol and erythritol led to bloating and diarrhea in 70% and 60% of subjects respectively (n.s.). | Gastric emptying was slowed during the first 60 mins after xylitol and erythritol vs. Control<br>Plasma CCK, plasma GLP-1, Plasma glucose increased after xylitol and erythritol vs. control<br>Plasma insulin increased after xylitol, but not after erythritol vs. control |

|        |                                                      |                                             |                                                                                                                                       |                         |          |                                                                                                                                                                                                                                                                                                                                                                                                           |                                                                                                                                                                                                                                                                                                                                                                                                          |
|--------|------------------------------------------------------|---------------------------------------------|---------------------------------------------------------------------------------------------------------------------------------------|-------------------------|----------|-----------------------------------------------------------------------------------------------------------------------------------------------------------------------------------------------------------------------------------------------------------------------------------------------------------------------------------------------------------------------------------------------------------|----------------------------------------------------------------------------------------------------------------------------------------------------------------------------------------------------------------------------------------------------------------------------------------------------------------------------------------------------------------------------------------------------------|
|        | Meyer-Gerspach et al. (2018) <sup>8</sup><br>Belgium | 12 subjects (6 men, 6 women, 23 y, BMI 23)  | Ace-K (220 mg)<br>Comparator:<br>Tap water                                                                                            | Nasogastric catheter    | N/A      | Hunger:<br>Strong initial decrease in hunger after Ace-K with a faster return of hunger after first time point and slower return of hunger in last part of curve after Ace-K vs. Control<br>Satiation:<br>Strong initial increase in satiation after Ace-K vs. control with faster decrease after first time point and slower decrease in last part of curve after Ace-K vs. control<br>No adverse events | GI motility did not differ between Ace-K and control.<br>A faster linear decrease in IGP from first post infusion time point, quicker return of IGP and quicker flattening of the curve during IGP recovery with faster return to baseline in last part of the IGP curve after Ace-K vs. control<br>No effect of Ace-K on plasma motilin, octanoylated ghrelin, active GLP-1, CCK, gastrin, and glucose. |
| Bitter | Little et al. (2009) <sup>3</sup><br>UK              | 12 subjects                                 | Naringin ( <del>4</del><br><del>M</del> 290.27 mg)<br>Quinine ( <del>0.198</del><br><del>M</del> 32.2 mg)<br>Comparator:<br>Tap water | Nasogastric catheter    | N/A      | No effects of naringin or quinine on hunger or fullness scores compared with water                                                                                                                                                                                                                                                                                                                        | No effects of naringin or quinine on gastric emptying compared with water                                                                                                                                                                                                                                                                                                                                |
|        | Andreozzi et al. (2015) <sup>9</sup><br>Italy        | 20 subjects (8 men, 12 women, 27 y, BMI 24) | QHCl capsule (18 mg)                                                                                                                  | Acid resistant capsules | -82 Kcal | QHCl did not affect satiety or desire to eat scores vs. Control.<br>No adverse events                                                                                                                                                                                                                                                                                                                     | GE (evaluated in 8 subjects): no differences in GE between QHCl (87 mins) vs. Control (88 mins)                                                                                                                                                                                                                                                                                                          |

|                                                           |                                                 |                                                                               |                                                                                       |                                                                                   |  |                                                                                                                     |                                                                                                                                                                                                                                           |
|-----------------------------------------------------------|-------------------------------------------------|-------------------------------------------------------------------------------|---------------------------------------------------------------------------------------|-----------------------------------------------------------------------------------|--|---------------------------------------------------------------------------------------------------------------------|-------------------------------------------------------------------------------------------------------------------------------------------------------------------------------------------------------------------------------------------|
|                                                           |                                                 |                                                                               | Comparator:<br>Placebo capsule                                                        |                                                                                   |  |                                                                                                                     | CCK:<br>Higher $\Delta T90$ vs T0 and $\Delta T90$ vs T60 after QHCl vs. Control                                                                                                                                                          |
| Avau et al. (2015) <sup>10</sup><br>Belgium               | 12 subjects (5 men, 30.6 y, BMI 23.8)           | DB (1 $\mu$ mol/0.447 mg/kg body weight)                                      | Nasogastric catheter                                                                  | N/A                                                                               |  | DB made subjects feel satiated earlier and at lower volumes during constant nutrient infusion<br>No adverse effects | Less drop in IGP after DB                                                                                                                                                                                                                 |
| Van Avesaat et al. (2015) <sup>6</sup><br>The Netherlands | 15 subjects (6 men, 9 women, 22.4 y, BMI 22.4)  | QHCl (75 mg)<br>Comparator:<br>Tap water                                      | Nasoduodenal catheter                                                                 | -44 Kcal (n.s.)                                                                   |  | Quinine did not influence appetite sensations.<br>Quinine did not induce GI symptoms                                | Quinine did not affect plasma CCK, GLP-1, or PYY levels.                                                                                                                                                                                  |
| Mennella et al. (2016) <sup>11</sup><br>Italy             | 20 subjects (11 men, 9 women, 25.3 y, BMI 22.1) | Microencapsulated bitter secoiridoids (100 mg)<br>Comparator:<br>Coating only | Microencapsulation to mask oral tasting. Exact location of effect in GI tract unknown | Lunch: - 88 Kcal (n.s.)<br>Post-lunch: -252 Kcal<br>24h energy intake: - 340 Kcal |  | no effect of bitter encapsulate on fullness, satiety, hunger or desire to eat                                       | Bitter encapsulate increased plasma GLP-1 30 mins after intervention, but had no effect on blood glucose, plasma amylin, plasma ghrelin, plasma glucagon, plasma GIP, plasma insulin, plasma leptin, plasma PP, or plasma PYY vs. Control |

|                                                          |                                                    |                                                                                                                                                                                              |                                                       |                                                                                                                                                                                                  |                                                                                                                                                                                                                                                                                                                              |                                                                                                                                                                                                                                                                                                                                                 |
|----------------------------------------------------------|----------------------------------------------------|----------------------------------------------------------------------------------------------------------------------------------------------------------------------------------------------|-------------------------------------------------------|--------------------------------------------------------------------------------------------------------------------------------------------------------------------------------------------------|------------------------------------------------------------------------------------------------------------------------------------------------------------------------------------------------------------------------------------------------------------------------------------------------------------------------------|-------------------------------------------------------------------------------------------------------------------------------------------------------------------------------------------------------------------------------------------------------------------------------------------------------------------------------------------------|
| Peters et al.<br>(2016) <sup>12</sup><br>The Netherlands | 57 subjects (all<br>women, 40.5 y,<br>BMI 26.5)    | Bitter mixture<br>containing:<br>Raisin <del>flower</del><br><u>flavor</u> (22.0 mg)<br>Sucrose Octa<br>Acetate (0.88 mg)<br>Quassia extract<br>(0.088 mg)<br>Comparator:<br>Placebo capsule | Intragastric<br>capsule, 2 times<br>daily for 14 days | Day 0 vs. day 14:<br>Meals only: -109 Kcal (n.s.)<br>Meals_+_snack: -86 Kcal (n.s.)<br>Breakfast: -30 Kcal (n.s.)<br>Lunch: -61 Kcal (n.s.)<br>Dinner: -1 Kcal (n.s.)<br>Snacks: +41 Kcal (n.s.) | N/A                                                                                                                                                                                                                                                                                                                          | N/A                                                                                                                                                                                                                                                                                                                                             |
| Deloose et al.<br>(2017) <sup>13</sup><br>Belgium        | 20 subjects (10<br>men, 10 women,<br>27 y, BMI 24) | DB ( <del>1 μmol</del> <u>0.447</u><br><u>mg</u> /Kg body<br>weight)<br>Comparator:<br>Tap water                                                                                             | Nasogastric<br>catheter                               | N/A                                                                                                                                                                                              | Women:<br>Switch from gastric to duodenal<br>phase 3 origin was accompanied by<br>lower percentage change of hunger<br>scores after DB vs. Control<br>Men:<br>Percentage change in hunger scores<br>during phase 3 contraction did not<br>differ after DB vs. Control (n.s.)<br>No adverse events after DB<br>administration | Women:<br>DB reduced number of gastric<br>phase 3 contractions from 67%<br>(control) to 33% (DB) in women.<br>Interval between IG administration<br>and occurrence of phase 3 did not<br>differ between control (76 min) and<br>DB (93 min) in women (n.s.).<br>Men:<br>No difference in origin of phase 3<br>contractions between control (57% |

gastric) and DB (40% gastric) in men (n.s.).

Interval between IG administration and occurrence of phase 3 did not differ between control (76 min) and DB (111 min) in men (n.s.).

|                                       |                                                                                            |                      |                 |                                                                                                                                                                                      |                                                                                                                                         |
|---------------------------------------|--------------------------------------------------------------------------------------------|----------------------|-----------------|--------------------------------------------------------------------------------------------------------------------------------------------------------------------------------------|-----------------------------------------------------------------------------------------------------------------------------------------|
| 12 subjects (all women, 31 y, BMI 22) | DB ( <del>1 <math>\mu</math>mol</del> 0.447 mg/Kg body weight)<br>Comparator:<br>Tap water | Nasogastric catheter | N/A             | No adverse events after DB administration                                                                                                                                            | Plasma motilin was lower after DB vs. Control. No differences between plasma total ghrelin or octanoylated ghrelin after DB vs. Control |
| 13 subjects (all women, 28 y, BMI 23) | DB ( <del>1 <math>\mu</math>mol</del> 0.447 mg/Kg body weight)<br>Comparator:<br>Tap water | Nasogastric catheter | N/A             | Hunger scores after a standardized meal were lower after DB vs. Control. Satiety scores were higher after a standardized meal after DB.<br>No adverse events after DB administration | GE (measured in 6 subjects) did not differ between control and DB (both 109 mins).                                                      |
| 20 subjects (all women, 23 y, BMI 22) | DB ( <del>1 <math>\mu</math>mol</del> 0.447 mg/Kg body weight)<br>Comparator:              | Nasogastric catheter | -76 Kcal (n.s.) | No adverse events after DB administration                                                                                                                                            | N/A                                                                                                                                     |

| Tap water                                          |                                          |                                                                                               |                       |                                                                      |                                                                                                                                                                                                                    |                                                                                                                                                                                                                                                |  |
|----------------------------------------------------|------------------------------------------|-----------------------------------------------------------------------------------------------|-----------------------|----------------------------------------------------------------------|--------------------------------------------------------------------------------------------------------------------------------------------------------------------------------------------------------------------|------------------------------------------------------------------------------------------------------------------------------------------------------------------------------------------------------------------------------------------------|--|
| Deloosse et al. (2018) <sup>14</sup><br>Belgium    | 10 subjects (10 women, 33 y, BMI 22)     | QHCl ( <del>10 µmol</del> <sup>3.6</sup> mg/kg body weight)<br>Comparator:<br>Milli-Q water   | Nasogastric catheter  | N/A                                                                  | No adverse events                                                                                                                                                                                                  | Plasma motilin and plasma ghrelin levels decreased after QHCl. No difference in plasma octanoylated ghrelin levels<br>Time* treatment effect for antral motility. No main effect of treatment.<br>No effects of QHCl on duodenal motility.     |  |
| Bitarafan et al. (2019) <sup>15</sup><br>Australia | 14 subjects (14 men, 25 y, BMI 22.5)     | QHCl (37.5 mg, Q37.5))<br>QHCl (75 mg, Q75))<br>QHCl (225 mg, Q225))<br>Comparator:<br>Saline | Nasoduodenal catheter | Q37.5: - 31Kcal (n.s.), Q75: - 59 Kcal (n.s.), Q225: -11 Kcal (n.s.) | No differences in VAS scores for hunger, desire to eat, prospective consumption, or fullness after Q37.5, Q75, or Q225 vs. Control.<br>No adverse events, no effects of Q37.5, Q75, or Q225 on nausea or bloating. | No effect of Q37.5, Q75, or Q225 on antral pressure waves, basal pyloric pressure, isolated pyloric pressure waves, and duodenal pressure waves vs. Control.<br>No effects of Q37.5, Q75, and Q225 on plasma CCK or blood glucose vs. Control. |  |
| Iven et al. (2019) <sup>16</sup><br>Belgium        | 16 subjects (16 women, 24.5 y, BMI 21.9) | QHCl ( <del>10 µmol</del> <sup>3.6</sup> mg/Kg body weigh)                                    | Nasogastric catheter  | -67.6 Kcal                                                           | Hunger scores increased after control and decreased after QHCl (n.s.)                                                                                                                                              | Decreases in total ghrelin, octanoylated ghrelin, and motilin after QHCl vs. control                                                                                                                                                           |  |



|                                                   |                                     |                                                                                                                    |                        |     |  |                                                                                                                                                                                                                                                      |                                                                                                                                                                                                                                                                                                       |
|---------------------------------------------------|-------------------------------------|--------------------------------------------------------------------------------------------------------------------|------------------------|-----|--|------------------------------------------------------------------------------------------------------------------------------------------------------------------------------------------------------------------------------------------------------|-------------------------------------------------------------------------------------------------------------------------------------------------------------------------------------------------------------------------------------------------------------------------------------------------------|
|                                                   |                                     | Comparator:<br>Milli-Q water                                                                                       |                        |     |  | Prospective food consumption scores decreased after QHCl vs. Control<br>Satiety scores increased after QHCl vs. Control<br>fullness scores increased after QHCl vs. control<br>Minimal nausea scores reported                                        | Brain activity in homeostatic and hedonic regions:<br>Increased activity after QHCl vs. Control in anterior insula, ACC, amygdala, putamen, nucleus accumbens, pallidum, caudate head and caudate body, medial and lateral OFC, hypothalamus and midbrain.<br>Decreased activity in brainstem/medulla |
| Walker et al. (2019) <sup>17</sup><br>New Zealand | 30 subjects (30 men, 24y, BMI 23.1) | Amarasate extract capsule (500 mg, HD)<br>Amarasate extract capsule (200 mg, LD)<br>Comparator:<br>Placebo capsule | Acid resistant capsule | N/A |  | From T=90 onwards HD and LD show lower mean changes in hunger and fullness<br>Lower mean changes in fullness for HD from t=120 onwards, only t=180 and t=330 for LD.<br>No nausea. 3 participants in HD and 1 in LD had liquid loose bowel movements | N/A                                                                                                                                                                                                                                                                                                   |

|                                                    |                                      |                                                                     |                      |                                                                        |                                                                                                                                                                                             |                                                                                                                                                                                                                                                                                                                                                                                                                                 |
|----------------------------------------------------|--------------------------------------|---------------------------------------------------------------------|----------------------|------------------------------------------------------------------------|---------------------------------------------------------------------------------------------------------------------------------------------------------------------------------------------|---------------------------------------------------------------------------------------------------------------------------------------------------------------------------------------------------------------------------------------------------------------------------------------------------------------------------------------------------------------------------------------------------------------------------------|
| Bitarafan et al. (2020) <sup>18</sup><br>Australia | 15 subjects (15 men, 26 y, BMI 23.2) | QHCl (275 mg, Q275)<br>QHCl (600 mg, Q600)<br>Comparator:<br>Saline | Nasogastric catheter | N/A                                                                    | No effects of Q275 or Q600 on hunger, desire to eat, prospective consumption, or fullness scores.<br>No effects of Q275 or Q600 on bloating or nausea vs. Control. No other adverse effects | No effects of Q275 or Q600 on gastric emptying.<br>Plasma insulin was increased 30 mins after Q275 and Q600 vs. Control.<br>No effects of Q275 or Q600 on plasma glucose, plasma glucagon, or plasma GLP-1.<br>After mixed nutrient drink:<br>Q275 and Q600 lowered glucose<br>Q275 and Q600 increased plasma insulin<br>No difference in glucagon response after nutrient drink.<br>Q275 increased plasma GLP-1, Q600 did not. |
|                                                    | 12 subjects (12 men, 26 y, BMI 23.1) | QHCl (275 mg, Q275)<br>QHCl (600 mg, Q600)<br>Comparator:           | Nasogastric catheter | No effect of treatment on energy intake Q275: +26 Kcal, Q600: -53 Kcal | No effects of Q275 or Q600 on hunger, desire to eat, prospective consumption, or fullness scores.                                                                                           | N/A                                                                                                                                                                                                                                                                                                                                                                                                                             |

|                    |                                                           |                                                 |                                                                                             |                              |                                                                                                          |                                                                                                                                                                        |                                                                       |
|--------------------|-----------------------------------------------------------|-------------------------------------------------|---------------------------------------------------------------------------------------------|------------------------------|----------------------------------------------------------------------------------------------------------|------------------------------------------------------------------------------------------------------------------------------------------------------------------------|-----------------------------------------------------------------------|
|                    |                                                           |                                                 | Saline                                                                                      |                              |                                                                                                          | No effects of Q275 or Q600 on bloating or nausea vs. Control. No other adverse effects                                                                                 |                                                                       |
| <b>Umami</b>       | Van Avesaat et al. (2015) <sup>6</sup><br>The Netherlands | 15 subjects (6 men, 9 women, 22.4 y, BMI 22.4)  | MSG (2 g)<br>Comparator:<br>Tap water                                                       | Intraduodenal catheter       | + 5 Kcal (n.s.)                                                                                          | MSG decreased hunger and desire to eat, but did not influence satiation or fullness.<br><br>MSG did not induce GI symptoms                                             | Monosodium glutamate did not affect plasma CCK, GLP-1, or PYY levels. |
| <b>Combination</b> | Van Avesaat et al. (2015) <sup>6</sup><br>The Netherlands | 15 subjects (6 men, 9 women, 22.4 y, BMI 22.4)  | Tastant mixture:<br>Reb-A (540 mg)<br>QHCl (75 mg)<br>MSG (2 g)<br>Comparator:<br>Tap water | Nasoduodenal catheter        | -64 Kcal                                                                                                 | The tastant mixture decreased hunger and desire to eat, but not satiation or fullness.<br><br>The tastant mixture did not induce GI symptoms                           | The tastant mixture did not affect plasma CCK, GLP-1, or PYY levels.  |
|                    | Klaassen et al. (2019) <sup>19</sup><br>The Netherlands   | 14 subjects (3 men, 11 women, 25.6 y, BMI 22.3) | Tastant mixture:<br>Reb-A (540 mg)<br>QHCl (75 mg)<br>MSG (2 g)<br>Comparator:<br>Tap water | Naso-duodenal-ileal catheter | Duodenal +16.7 Kcal (n.s.),<br>ileal +28.1 Kcal (n.s.),<br>combined duodenal and ileal +31.5 Kcal (n.s.) | No effects of duodenal-, ileal- or combined duodenal and ileal taste receptor activation on appetite sensations.<br><br>The tastant mixture did not induce GI symptoms | N/A                                                                   |

---

y: years, BMI: body mass index, N/A: not applicable, n.s.: not significant, GE: gastric emptying, GLP-1: glucagon like peptide 1, GIP: glucose-dependent insulintropic polypeptide, Ace-K: acesulfame potassium, PYY: peptide yy, Reb-A: rebaudioside A, GI: gastrointestinal, CCK: cholecystokinin, IGP: intragastric pressure, QHCL: quinine hydrochloride, DB: denatonium benzoate, PP: pancreatic polypeptide, IG: intragastric, ACC: anterior cingulate cortex, OFC: orbitofrontal cortex, MSG: monosodium glutamate

1. Rogers PJ, Fleming HC, Blundell JE. Aspartame Ingested without Tasting Inhibits Hunger and Food-Intake. *Physiology & Behavior*. 1990;47(6):1239-43.
2. Black RM, Leiter LA, Anderson GH. Consuming aspartame with and without taste: differential effects on appetite and food intake of young adult males. *Physiol Behav*. 1993;53(3):459-66.
3. Little TJ, Gupta N, Case RM, Thompson DG, McLaughlin JT. Sweetness and bitterness taste of meals per se does not mediate gastric emptying in humans. *Am J Physiol Regul Integr Comp Physiol*. 2009;297(3):R632-9.
4. Ma J, Bellon M, Wishart JM, et al. Effect of the artificial sweetener, sucralose, on gastric emptying and incretin hormone release in healthy subjects. *Am J Physiol Gastrointest Liver Physiol*. 2009;296(4):G735-9.
5. Steinert RE, Frey F, Topfer A, Drewe J, Beglinger C. Effects of carbohydrate sugars and artificial sweeteners on appetite and the secretion of gastrointestinal satiety peptides. *Br J Nutr*. 2011;105(9):1320-8.
6. van Avesaat M, Troost FJ, Ripken D, Peters J, Hendriks HF, Masclee AA. Intraduodenal infusion of a combination of tastants decreases food intake in humans. *Am J Clin Nutr*. 2015;102(4):729-35.
7. Wolnerhanssen BK, Cajacob L, Keller N, et al. Gut hormone secretion, gastric emptying, and glycemic responses to erythritol and xylitol in lean and obese subjects. *Am J Physiol Endocrinol Metab*. 2016;310(11):E1053-61.
8. Meyer-Gerspach AC, Biesiekierski JR, Deloof E, et al. Effects of caloric and noncaloric sweeteners on antroduodenal motility, gastrointestinal hormone secretion and appetite-related sensations in healthy subjects. *Am J Clin Nutr*. 2018;107(5):707-16.
9. Andreozzi P, Sarnelli G, Pesce M, et al. The Bitter Taste Receptor Agonist Quinine Reduces Calorie Intake and Increases the Postprandial Release of Cholecystokinin in Healthy Subjects. *Journal of Neurogastroenterology and Motility*. 2015;21(4):511-9.
10. Avau B, Rotondo A, Thijs T, et al. Targeting extra-oral bitter taste receptors modulates gastrointestinal motility with effects on satiation. *Sci Rep*. 2015;5:15985.
11. Mennella I, Fogliano V, Ferracane R, Arlorio M, Pattarino F, Vitaglione P. Microencapsulated bitter compounds (from *Gentiana lutea*) reduce daily energy intakes in humans. *Br J Nutr*. 2016:1-10.
12. Peters HPF, Koppenol W, Schuring EAH, Gouka R, Mela DJ, Blom WAM. The effect of two weeks ingestion of a bitter tastant mixture on energy intake in overweight females. *Appetite*. 2016;107:268-73.

13. Deloouse E, Janssen P, Corsetti M, et al. Intra-gastric infusion of denatonium benzoate attenuates interdigestive gastric motility and hunger scores in healthy female volunteers. *Am J Clin Nutr*. 2017;105(3):580-8.
14. Deloouse E, Corsetti M, Van Oudenhove L, Depoortere I, Tack J. Intra-gastric infusion of the bitter tastant quinine suppresses hormone release and antral motility during the fasting state in healthy female volunteers. *Neurogastroenterology and Motility*. 2018;30(1).
15. Bitarafan V, Fitzgerald PCE, Little TJ, et al. Effects of Intraduodenal Infusion of the Bitter Tastant, Quinine, on Antropyloroduodenal Motility, Plasma Cholecystokinin, and Energy Intake in Healthy Men. *Journal of Neurogastroenterology and Motility*. 2019;25(3):413-22.
16. Iven J, Biesiekierski JR, Zhao DX, et al. Intra-gastric quinine administration decreases hedonic eating in healthy women through peptide-mediated gut-brain signaling mechanisms. *Nutritional Neuroscience*. 2019;22(12):850-62.
17. Walker E, Lo K, Tham S, et al. New Zealand Bitter Hops Extract Reduces Hunger During a 24 h Water Only Fast. *Nutrients*. 2019;11(11).
18. Bitarafan V, Fitzgerald PCE, Little TJ, et al. Intra-gastric administration of the bitter tastant quinine lowers the glycemic response to a nutrient drink without slowing gastric emptying in healthy men. *Am J Physiol Regul Integr Comp Physiol*. 2020;318(2):R263-R73.
19. Klaassen T, Alleleyn AME, van Avesaat M, Troost FJ, Keszthelyi D, Masclee AAM. Intra-intestinal Delivery of Tastants Using a Naso-Duodenal-Ileal Catheter Does Not Influence Food Intake or Satiety. *Nutrients*. 2019;11(2).
